# Supplementary material for: Study on the effect and mechanism of Ag and Bi2MoO6 modification on the CO2 photo-thermal reduction performance of g-C3N4 catalysts with localized surface plasmon resonance
Source: Royal Society of Chemistry journal article supplement (doi:10.1039/d4cy00930d), 2024-01-01
Supplement: d4cy00930d1.pdf [file d4cy00930d1.pdf]

## Supplementary Materials

### **Study on the effect and mechanism of Ag and Bi<sub>2</sub>MoO<sub>6</sub> modification on the CO<sub>2</sub> photo-thermal reduction performance of g-C<sub>3</sub>N<sub>4</sub> catalysts with Localized Surface Plasmon Resonance**

Bin Guan\*, Junyan Chen, Zhongqi Zhuang, Zhan Gao, Zeren Ma, Xuehan Hu, Chenyu Zhu, Sikai

Zhao, Kaiyou Shu, Hongtao Dang, Tiankui Zhu, Zhen Huang

*Key Laboratory for Power Machinery and Engineering of Ministry of Education,*

*Shanghai Jiao Tong University, Shanghai 200240, China*

\*Corresponding author: Bin Guan

Dongchuan Road No.800, Min Hang District, Shanghai, P.R.China 200240

Tel.: +86 21 34206859; fax: +86 21 34205553.

E-mail: [guanbin@sjtu.edu.cn](mailto:guanbin@sjtu.edu.cn)

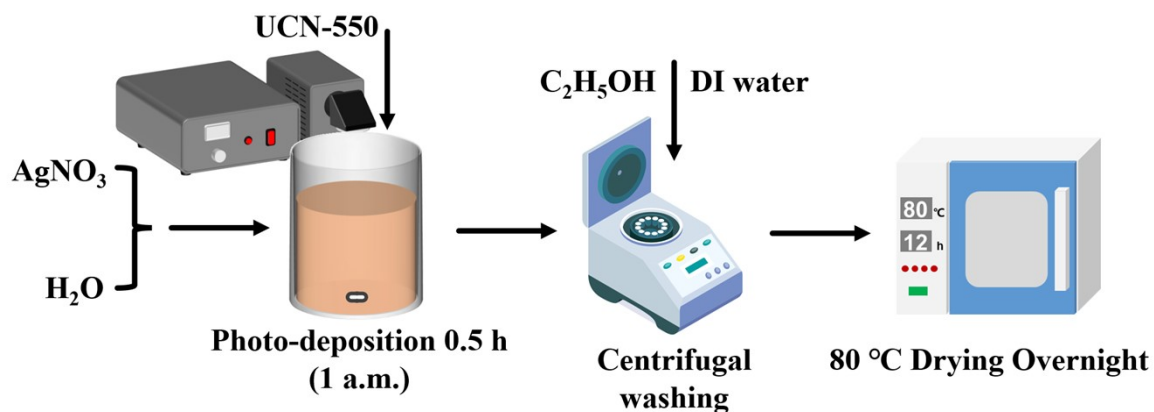

Figure S1 Preparation process of Ag/g-C<sub>3</sub>N<sub>4</sub> by photo-deposition synthesis method

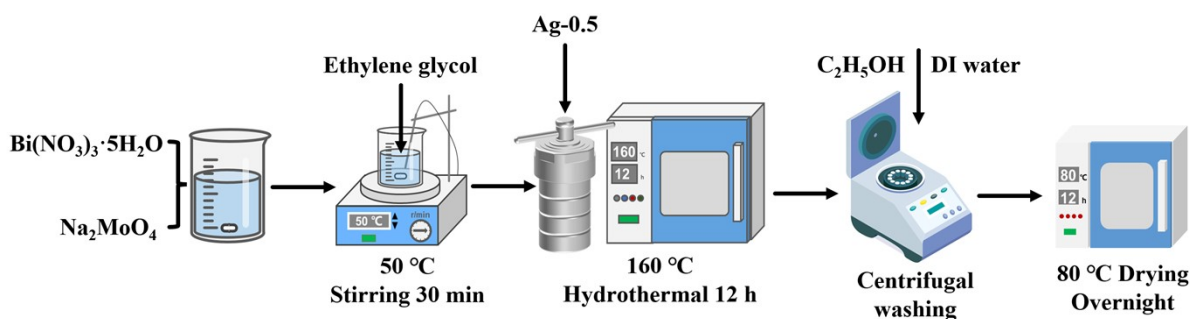

Figure S2 Preparation process of Ag&BMO/g-C<sub>3</sub>N<sub>4</sub> by solvent thermal synthesis method

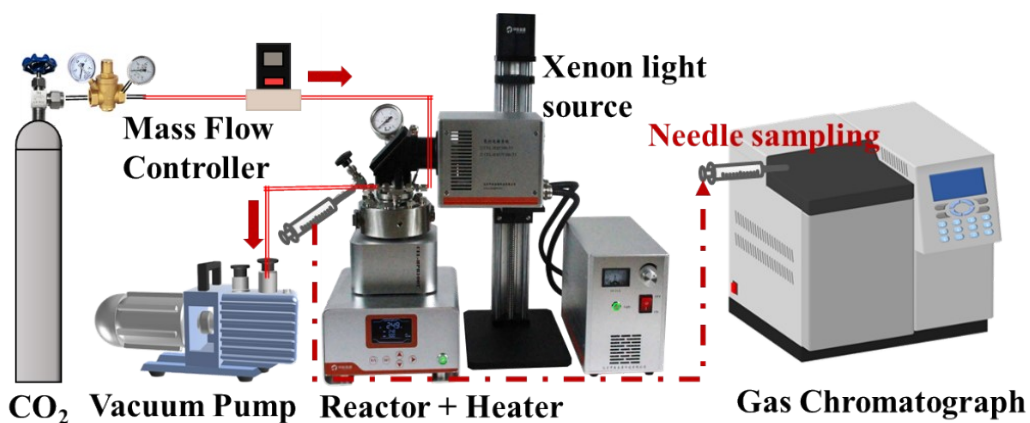

Figure S3 Schematic diagram of the photothermal coupling catalyst performance evaluation system test

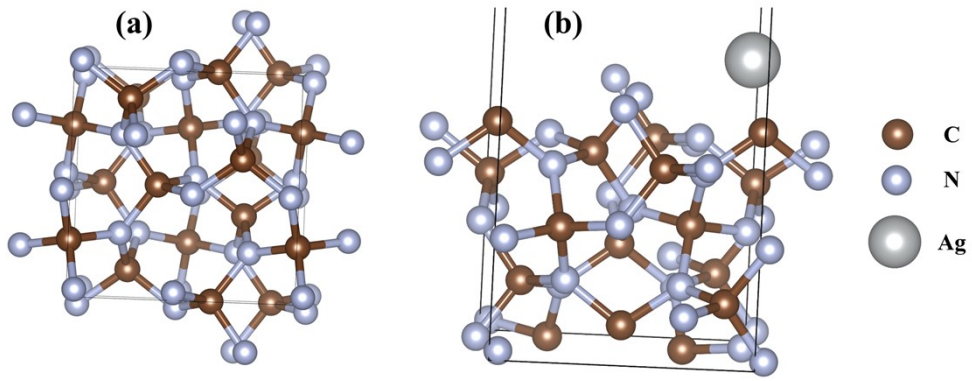

Figure S4 Site conformation of (a)  $g\text{-C}_3\text{N}_4$  and (b)  $\text{Ag}/g\text{-C}_3\text{N}_4$

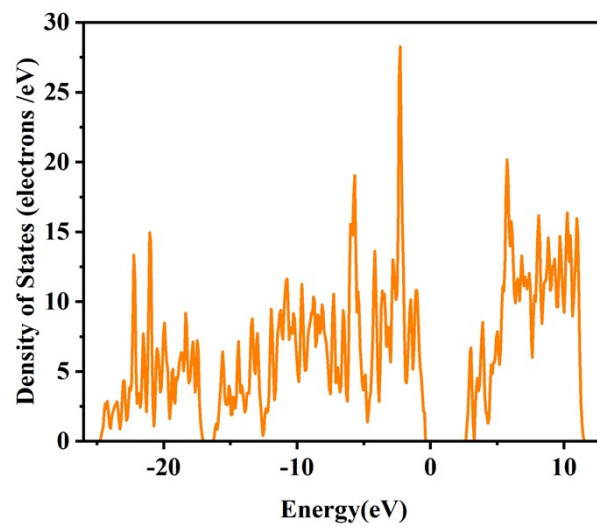

Figure S5 Density of States of  $g\text{-C}_3\text{N}_4$  catalyst

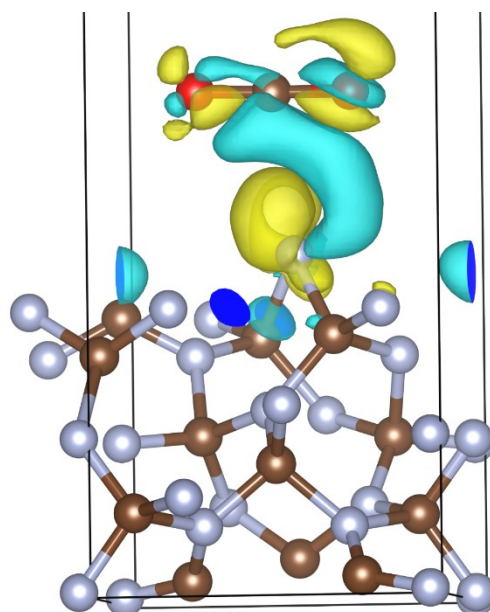

Figure S6 Difference Charge Density of g-C<sub>3</sub>N<sub>4</sub> catalyst before and after CO<sub>2</sub> absorption

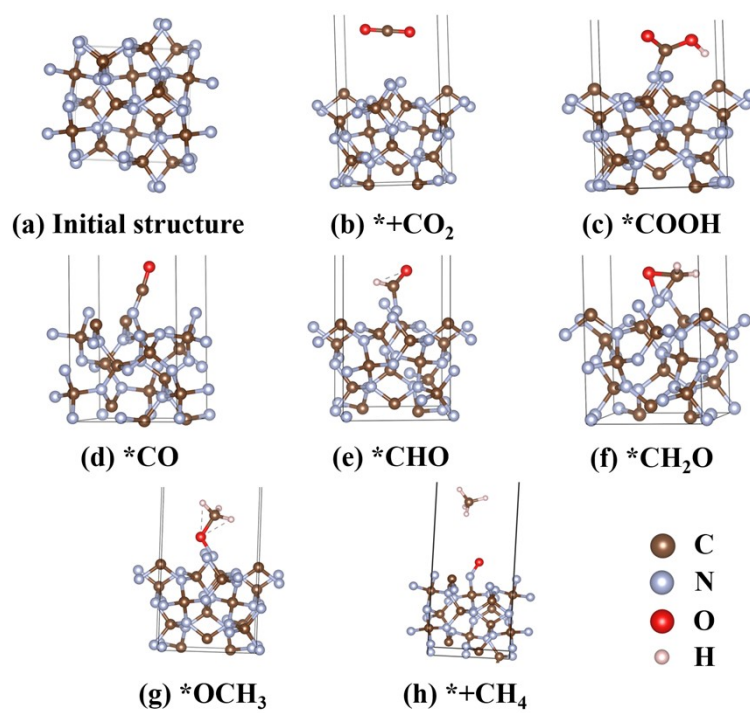

Figure S7 CO<sub>2</sub> Reduction process of g-C<sub>3</sub>N<sub>4</sub> catalyst

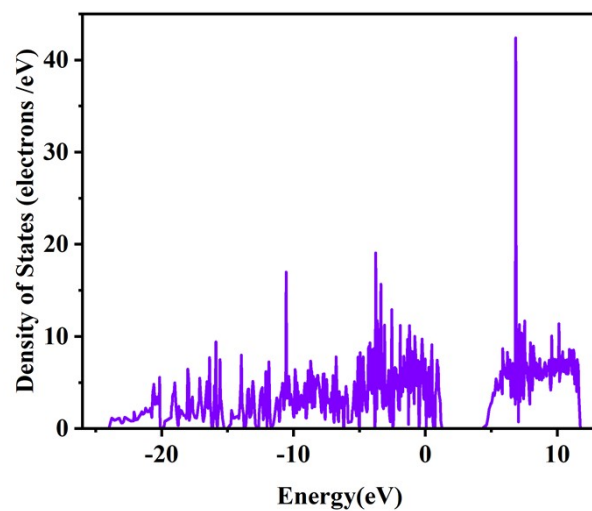

Figure S8 Density of States of Ag/g-C<sub>3</sub>N<sub>4</sub> catalyst

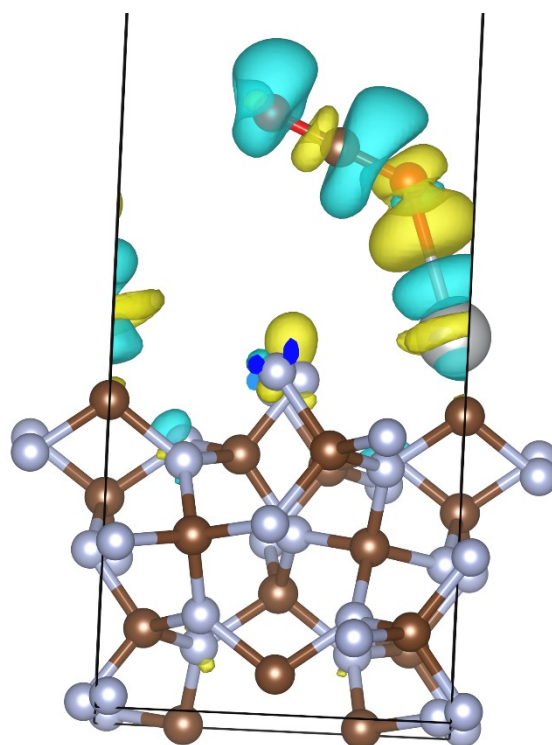

Figure S9 Difference Charge Density of Ag/g-C<sub>3</sub>N<sub>4</sub> catalyst before and after CO<sub>2</sub> absorption

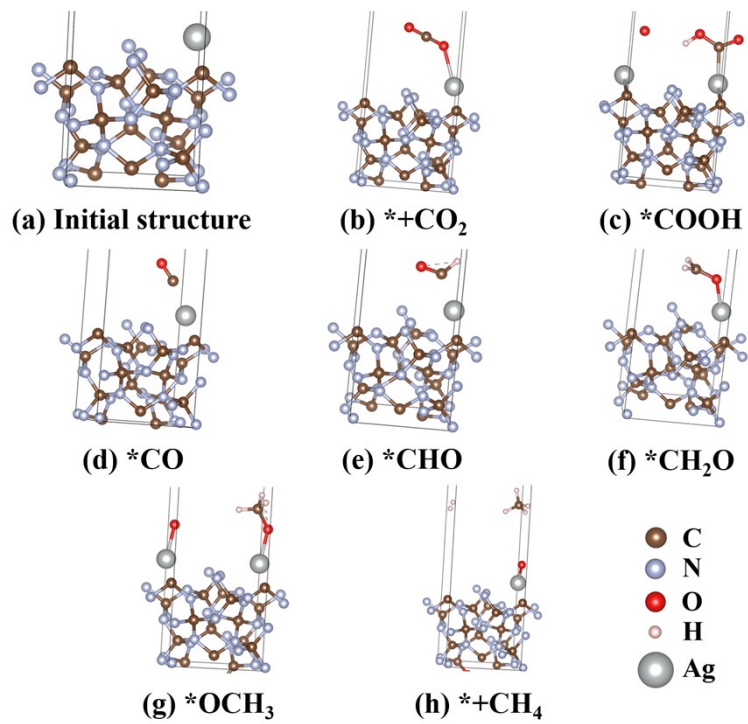

Figure S10  $\text{CO}_2$  Reduction process of Ag/g- $\text{C}_3\text{N}_4$  catalyst
